# Supplementary material
Source: publisher figshare collection journal article supplement (https://acs.figshare.com/ndownloader/files/18017909)
Supplement: Supplementary file 1 [file 18017909]

# Supporting Information

Table S1 The amount of hydrogen produced by the interaction between stainless steel wire and other different materials

|            | Figure 3a  |                      | Figure 3b |                      | Figure 3c     |                      |
|------------|------------|----------------------|-----------|----------------------|---------------|----------------------|
|            | GaIn alloy | stainless steel wire | Al strip  | stainless steel wire | GaIn alloy+Al | stainless steel wire |
| noncontact | +          | -                    | +++       | -                    | ++++          | -                    |
| contact    | -          | ++                   | ++        | ++                   | +++           | ++                   |

Note: The “-” symbol means no hydrogen is produced, while “+” represents the amount of hydrogen.
